# Supplementary material for: A Genome-Wide Analysis Reveals No Nuclear Dobzhansky-Muller Pairs of Determinants of Speciation between S. cerevisiae and S. paradoxus, but Suggests More Complex Incompatibilities
Source: PLoS Genet. 2010 Jul 29;6(7):e1001038. doi: 10.1371/journal.pgen.1001038 (PMC2912382; doi:10.1371/journal.pgen.1001038)
Supplement: Table S5 — Statistically significant pairs of interchromosomal regions in the S. paradoxus genome using chi-square test and an FDR of 0.01. (0.05 MB XLS) [file pgen.1001038.s007.xls]

## Sheet: Sheet1
Beg_A	End_A	Chr_A	Beg_B	End_B	Chr_B	1/1	1/0	0/1	0/0	Exp_1/1	Exp_1/0	Exp_0/1	Exp_0/0	chisq_stat	p-value	FDR
83088	121531	1	679040	693616	10	29	11	15	28	19.9245	20.7547	21.283	22.1698	12.1066	0.00702688	0.0080089
83088	121531	1	693616	700736	10	29	11	14	29	19.5094	21.1698	20.8396	22.6132	13.5509	0.00358475	0.00464534
121531	122287	1	669441	675513	10	29	12	13	29	19.5283	22.0755	19.9623	22.566	13.4552	0.00374879	0.00464534
121531	122287	1	679040	693616	10	30	11	14	28	20.3774	21.2264	20.8302	21.6981	13.5408	0.0036018	0.00464534
122287	136252	1	679040	693616	10	29	11	15	28	19.9245	20.7547	21.283	22.1698	12.1066	0.00702688	0.0080089
512807	569965	2	191368	242629	9	8	25	32	18	15.3585	16.0566	24.0755	25.1698	13.1577	0.00430764	0.00464534
569965	575803	2	103210	131879	9	8	26	30	18	15.0566	16.8491	22.5849	25.2736	12.8051	0.00507773	0.0080089
575803	576305	2	103210	131879	9	9	27	29	17	15.8491	17.7358	21.7925	24.3868	12.4201	0.00607433	0.0080089
576305	580305	2	131879	166552	9	9	26	30	17	15.8208	16.9245	22.717	24.3019	12.3361	0.00631631	0.0080089
576305	580305	2	191368	242629	9	9	26	31	17	16.1887	16.9245	23.2453	24.3019	12.8397	0.00499639	0.0080089
600572	629553	2	85507	87313	9	10	27	29	16	16.6321	17.7925	21.9057	23.434	12.0653	0.00716286	0.0080089
600572	629553	2	99498	103210	9	9	28	28	17	15.8585	18.566	20.8868	24.4528	12.4538	0.00597974	0.0080089
600572	629553	2	131879	166552	9	10	27	29	16	16.6321	17.7925	21.9057	23.434	12.0653	0.00716286	0.0080089
600572	629553	2	191368	242629	9	10	27	30	16	17.0189	17.7925	22.4151	23.434	12.5845	0.00562708	0.0080089
655067	671348	2	99498	103210	9	10	29	27	16	16.6321	19.4717	20.1132	23.5472	12.0842	0.00710037	0.0080089
655067	671348	2	191368	242629	9	11	28	29	15	17.8491	18.6604	21.5849	22.566	12.3868	0.00616919	0.0080089
691799	718772	2	85507	87313	9	10	27	29	16	16.2264	17.3585	22.3113	23.8679	12.3432	0.00629525	0.0080089
691799	718772	2	99498	103210	9	9	28	28	17	15.4717	18.1132	21.2736	24.9057	12.7399	0.00523433	0.0080089
691799	718772	2	131879	166552	9	10	27	29	16	16.2264	17.3585	22.3113	23.8679	12.3432	0.00629525	0.0080089
691799	718772	2	191368	242629	9	10	27	30	16	16.6038	17.3585	22.8302	23.8679	12.827	0.00502601	0.0080089
718772	720649	2	49525	51085	9	11	27	30	14	17.434	17.8302	22	22.5	13.2105	0.00420273	0.00464534
718772	720649	2	85507	87313	9	10	28	29	15	17.0377	18.2264	21.5	23	13.5469	0.00359158	0.00464534
718772	720649	2	87313	99498	9	10	28	28	16	16.6415	18.6226	21	23.5	12.0995	0.0070501	0.0080089
718772	720649	2	99498	103210	9	9	29	28	16	16.2453	19.0189	20.5	24	13.88	0.00307309	0.00464534
718772	720649	2	103210	131879	9	10	28	28	16	16.6415	18.6226	21	23.5	12.0995	0.0070501	0.0080089
718772	720649	2	131879	166552	9	10	28	29	15	17.0377	18.2264	21.5	23	13.5469	0.00359158	0.00464534
718772	720649	2	191368	242629	9	10	28	30	15	17.434	18.2264	22	23	14.1025	0.0027689	0.00272469
718772	720649	2	242629	247285	9	11	27	30	15	17.8302	17.8302	22.5	22.5	12.3323	0.00632725	0.0080089
720649	724502	2	85507	87313	9	10	27	29	16	16.6321	17.7925	21.9057	23.434	12.0653	0.00716286	0.0080089
720649	724502	2	99498	103210	9	9	28	28	17	15.8585	18.566	20.8868	24.4528	12.4538	0.00597974	0.0080089
720649	724502	2	131879	166552	9	10	27	29	16	16.6321	17.7925	21.9057	23.434	12.0653	0.00716286	0.0080089
720649	724502	2	191368	242629	9	10	27	30	16	17.0189	17.7925	22.4151	23.434	12.5845	0.00562708	0.0080089
724502	725839	2	720108	731490	14	23	13	13	37	15.8585	21.2736	20.8868	28.0189	12.2906	0.00645131	0.0080089
725839	744266	2	265574	270494	9	11	28	29	15	17.4434	19.066	21.0943	23.0566	12.3444	0.00629173	0.0080089
725839	744266	2	315310	321198	9	11	28	29	15	17.4434	19.066	21.0943	23.0566	12.3444	0.00629173	0.0080089
139944	164637	3	176435	191459	13	27	12	15	34	19.5094	20.7547	23.5	25	12.8833	0.00489581	0.0080089
210077	212002	3	176435	191459	13	28	13	14	33	20.3962	21.6981	22.6132	24.0566	12.9271	0.00479701	0.0080089
212002	220684	3	120585	155778	13	27	13	14	34	19.5283	21.6509	22.566	25.0189	12.791	0.00511109	0.0080089
212002	220684	3	166648	176435	13	27	13	14	34	19.5283	21.6509	22.566	25.0189	12.791	0.00511109	0.0080089
212002	220684	3	176435	191459	13	28	12	14	34	19.9528	21.2264	23.0566	24.5283	14.4709	0.00232949	0.00272469
212002	220684	3	191459	201901	13	28	12	15	33	20.3774	20.8019	23.5472	24.0377	13.0197	0.00459413	0.00464534
220684	224392	3	176435	191459	13	28	13	14	33	20.3962	21.6981	22.6132	24.0566	12.9271	0.00479701	0.0080089
224392	230110	3	176435	191459	13	28	13	14	33	20.3962	21.6981	22.6132	24.0566	12.9271	0.00479701	0.0080089
230110	244383	3	176435	191459	13	29	14	13	32	21.283	22.6415	21.7264	23.1132	13.0181	0.0045976	0.00464534
133998	135098	4	452443	462634	8	22	9	21	43	14.1981	17.5	28.3962	35	12.1708	0.00682055	0.0080089
536669	542250	4	668020	694923	13	3	27	32	35	10.8679	18.717	24.7925	42.6981	12.8449	0.00498438	0.0080089
621392	623697	4	668020	694923	13	3	27	32	35	10.8679	18.717	24.7925	42.6981	12.8449	0.00498438	0.0080089
621392	623697	4	716155	741955	13	3	27	32	35	10.8679	18.717	24.7925	42.6981	12.8449	0.00498438	0.0080089
626992	631935	4	113539	120585	13	7	24	40	25	14.6321	15.566	31.9245	33.9623	12.9583	0.00472759	0.0080089
626992	631935	4	623389	662709	13	3	28	30	36	10.5849	19.9245	23.0943	43.4717	12.0573	0.00718939	0.0080089
626992	631935	4	662709	668020	13	3	28	31	35	10.8962	19.6132	23.7736	42.7925	12.9241	0.00480372	0.0080089
626992	631935	4	668020	694923	13	3	28	32	34	11.2075	19.3019	24.4528	42.1132	13.8227	0.00315676	0.00464534
626992	631935	4	694923	716155	13	3	28	31	35	10.8962	19.6132	23.7736	42.7925	12.9241	0.00480372	0.0080089
626992	631935	4	716155	741955	13	3	28	32	34	11.2075	19.3019	24.4528	42.1132	13.8227	0.00315676	0.00464534
626992	631935	4	741955	749161	13	3	28	31	35	10.8962	19.6132	23.7736	42.7925	12.9241	0.00480372	0.0080089
631935	678843	4	58473	63346	13	6	24	39	28	13.5849	16	30.9906	36.5	12.2844	0.00646986	0.0080089
631935	678843	4	63346	109743	13	6	24	40	27	13.8868	15.6981	31.6792	35.8113	13.2231	0.00417813	0.00464534
631935	678843	4	109743	113539	13	6	24	40	26	13.8868	15.3962	31.6792	35.1226	13.8422	0.00312807	0.00464534
631935	678843	4	113539	120585	13	6	24	41	25	14.1887	15.0943	32.3679	34.434	14.867	0.00193395	0.00272469
631935	678843	4	120585	155778	13	6	24	40	26	13.8868	15.3962	31.6792	35.1226	13.8422	0.00312807	0.00464534
631935	678843	4	155778	166648	13	6	24	39	27	13.5849	15.6981	30.9906	35.8113	12.8634	0.00494162	0.0080089
631935	678843	4	219664	226153	13	7	23	41	25	14.4906	14.7925	33.0566	33.7453	12.6012	0.0055835	0.0080089
631935	678843	4	668020	694923	13	3	27	32	35	10.8679	18.717	24.7925	42.6981	12.8449	0.00498438	0.0080089
631935	678843	4	716155	741955	13	3	27	32	35	10.8679	18.717	24.7925	42.6981	12.8449	0.00498438	0.0080089
678843	686252	4	31127	34078	13	6	23	40	27	13.4528	14.9151	32.1132	35.6038	12.5274	0.00577841	0.0080089
678843	686252	4	58473	63346	13	5	24	40	28	13.1604	15.5	31.4151	37	14.2565	0.00257598	0.00272469
678843	686252	4	63346	109743	13	5	24	41	27	13.4528	15.2075	32.1132	36.3019	15.2374	0.0016246	0.00158471
678843	686252	4	109743	113539	13	5	24	41	26	13.4528	14.9151	32.1132	35.6038	15.8947	0.00119179	0.00158471
678843	686252	4	113539	120585	13	5	24	42	25	13.7453	14.6226	32.8113	34.9057	16.962	0.000719569	0.00158471
678843	686252	4	120585	155778	13	5	24	41	26	13.4528	14.9151	32.1132	35.6038	15.8947	0.00119179	0.00158471
678843	686252	4	155778	166648	13	5	24	40	27	13.1604	15.2075	31.4151	36.3019	14.873	0.00192845	0.00272469
678843	686252	4	166648	176435	13	6	23	40	27	13.4528	14.9151	32.1132	35.6038	12.5274	0.00577841	0.0080089
678843	686252	4	201901	210373	13	7	22	42	25	14.3302	14.0377	34.2075	33.5094	12.2018	0.00672294	0.0080089
678843	686252	4	214778	219664	13	7	22	42	25	14.3302	14.0377	34.2075	33.5094	12.2018	0.00672294	0.0080089
678843	686252	4	219664	226153	13	6	23	42	25	14.0377	14.3302	33.5094	34.2075	14.4772	0.00232257	0.00272469
678843	686252	4	226153	232023	13	6	23	41	26	13.7453	14.6226	32.8113	34.9057	13.4796	0.00370637	0.00464534
678843	686252	4	245739	291384	13	6	23	40	27	13.4528	14.9151	32.1132	35.6038	12.5274	0.00577841	0.0080089
686252	687879	4	58473	63346	13	6	24	39	28	13.5849	16	30.9906	36.5	12.2844	0.00646986	0.0080089
686252	687879	4	63346	109743	13	6	24	40	27	13.8868	15.6981	31.6792	35.8113	13.2231	0.00417813	0.00464534
686252	687879	4	109743	113539	13	6	24	40	26	13.8868	15.3962	31.6792	35.1226	13.8422	0.00312807	0.00464534
686252	687879	4	113539	120585	13	6	24	41	25	14.1887	15.0943	32.3679	34.434	14.867	0.00193395	0.00272469
686252	687879	4	120585	155778	13	6	24	40	26	13.8868	15.3962	31.6792	35.1226	13.8422	0.00312807	0.00464534
686252	687879	4	155778	166648	13	6	24	39	27	13.5849	15.6981	30.9906	35.8113	12.8634	0.00494162	0.0080089
686252	687879	4	219664	226153	13	7	23	41	25	14.4906	14.7925	33.0566	33.7453	12.6012	0.0055835	0.0080089
686252	687879	4	668020	694923	13	3	27	32	35	10.8679	18.717	24.7925	42.6981	12.8449	0.00498438	0.0080089
686252	687879	4	716155	741955	13	3	27	32	35	10.8679	18.717	24.7925	42.6981	12.8449	0.00498438	0.0080089
687879	693232	4	113539	120585	13	7	24	40	25	14.6321	15.566	31.9245	33.9623	12.9583	0.00472759	0.0080089
693232	714294	4	63346	109743	13	7	25	39	26	14.7547	16.6792	30.8113	34.8302	12.6416	0.00547943	0.0080089
693232	714294	4	109743	113539	13	7	25	39	25	14.7547	16.3585	30.8113	34.1604	13.2734	0.00408124	0.00464534
693232	714294	4	113539	120585	13	7	25	40	24	15.0755	16.0377	31.4811	33.4906	14.3288	0.00249014	0.00272469
693232	714294	4	120585	155778	13	7	25	39	25	14.7547	16.3585	30.8113	34.1604	13.2734	0.00408124	0.00464534
693232	714294	4	155778	166648	13	7	25	38	26	14.434	16.6792	30.1415	34.8302	12.2672	0.0065217	0.0080089
693232	714294	4	219664	226153	13	8	24	40	24	15.3962	15.717	32.1509	32.8208	12.2052	0.00671243	0.0080089
714294	755864	4	113539	120585	13	7	24	40	25	14.6321	15.566	31.9245	33.9623	12.9583	0.00472759	0.0080089
801570	818554	4	113539	120585	13	8	25	39	24	15.5189	16.5094	31.0377	33.0189	12.5155	0.00581062	0.0080089
820639	827730	4	113539	120585	13	8	25	39	24	15.5189	16.5094	31.0377	33.0189	12.5155	0.00581062	0.0080089
827730	829542	4	63346	109743	13	8	26	38	25	15.6226	17.6604	29.9434	33.8491	12.1385	0.00692342	0.0080089
827730	829542	4	113539	120585	13	8	25	39	24	15.9623	16.9811	30.5943	32.5472	12.3124	0.00638619	0.0080089
829542	848305	4	120585	155778	13	8	26	38	24	16.0566	17.8019	29.5094	32.717	12.5833	0.00563002	0.0080089
829542	848305	4	662709	668020	13	4	30	30	33	12.217	21.9906	22.4528	40.4151	12.3412	0.0063013	0.0080089
848305	858632	4	623389	662709	13	4	31	29	33	12.1887	22.9434	21.4906	40.4528	12.3275	0.00634134	0.0080089
848305	858632	4	662709	668020	13	4	31	30	32	12.5472	22.5849	22.1226	39.8208	13.2987	0.00403315	0.00464534
858632	863699	4	623389	662709	13	4	32	29	32	12.5094	23.5472	21.1698	39.8491	13.265	0.00409713	0.00464534
858632	863699	4	662709	668020	13	4	32	30	31	12.8774	23.1792	21.7925	39.2264	14.2929	0.00253238	0.00272469
858632	863699	4	668020	694923	13	5	31	30	31	13.2453	22.8113	22.4151	38.6038	12.1366	0.00692959	0.0080089
863699	868813	4	623389	662709	13	4	31	29	33	12.1887	22.9434	21.4906	40.4528	12.3275	0.00634134	0.0080089
863699	868813	4	662709	668020	13	4	31	30	32	12.5472	22.5849	22.1226	39.8208	13.2987	0.00403315	0.00464534
884174	891607	4	662709	668020	13	4	30	30	33	12.217	21.9906	22.4528	40.4151	12.3412	0.0063013	0.0080089
902304	903280	4	662709	668020	13	5	32	29	31	13.2075	23.7736	21.4623	38.6321	12.1021	0.00704146	0.0080089
903280	904824	4	144904	147469	8	24	12	18	41	15.4528	19.8679	26.1509	33.6226	12.0026	0.00737422	0.0080089
903280	904824	4	147469	159914	8	24	12	17	42	15.0849	20.2358	25.5283	34.2453	13.2258	0.00417289	0.00464534
903280	904824	4	159914	172316	8	24	12	18	41	15.4528	19.8679	26.1509	33.6226	12.0026	0.00737422	0.0080089
904824	907342	4	144904	147469	8	25	12	17	41	15.8491	20.3774	25.7547	33.1132	13.582	0.00353301	0.00464534
907342	924544	4	144904	147469	8	24	12	18	41	15.4528	19.8679	26.1509	33.6226	12.0026	0.00737422	0.0080089
995163	1119561	4	144904	147469	8	24	12	18	41	15.4528	19.8679	26.1509	33.6226	12.0026	0.00737422	0.0080089
1119561	1127262	4	144904	147469	8	25	12	17	41	15.8491	20.3774	25.7547	33.1132	13.582	0.00353301	0.00464534
1127262	1130063	4	124717	128863	8	25	13	17	40	16.2453	20.8868	25.3585	32.6038	12.1289	0.00695429	0.0080089
1127262	1130063	4	144904	147469	8	25	13	17	40	16.2453	20.8868	25.3585	32.6038	12.1289	0.00695429	0.0080089
1130063	1183040	4	124717	128863	8	25	12	17	41	15.8491	20.3774	25.7547	33.1132	13.582	0.00353301	0.00464534
1183040	1201313	4	124717	128863	8	25	13	17	40	16.2453	20.8868	25.3585	32.6038	12.1289	0.00695429	0.0080089
1357655	1372692	4	124717	128863	8	25	13	17	40	16.2453	20.8868	25.3585	32.6038	12.1289	0.00695429	0.0080089
1383089	1383750	4	83564	124717	8	25	12	18	40	16.2264	20	26.3679	32.5	12.3302	0.00633351	0.0080089
1383089	1383750	4	124717	128863	8	25	12	17	41	15.8491	20.3774	25.7547	33.1132	13.582	0.00353301	0.00464534
1383750	1384325	4	83564	124717	8	25	12	18	40	16.2264	20	26.3679	32.5	12.3302	0.00633351	0.0080089
1383750	1384325	4	124717	128863	8	25	12	17	41	15.8491	20.3774	25.7547	33.1132	13.582	0.00353301	0.00464534
1383750	1384325	4	144904	147469	8	25	12	17	41	15.8491	20.3774	25.7547	33.1132	13.582	0.00353301	0.00464534
1384325	1415978	4	124717	128863	8	24	12	18	41	15.4528	19.8679	26.1509	33.6226	12.0026	0.00737422	0.0080089
1384325	1415978	4	144904	147469	8	24	12	18	41	15.4528	19.8679	26.1509	33.6226	12.0026	0.00737422	0.0080089
1456679	1461913	4	511675	547921	8	25	9	22	39	16.4057	17.1038	30.1509	31.434	12.3665	0.00622766	0.0080089
103473	118562	5	1013417	1018007	15	17	34	27	11	25	25.5	19.3396	19.7264	12.2879	0.00645924	0.0080089
971940	991911	7	633004	643702	16	25	10	18	37	16.6038	18.8679	25.7358	29.2453	12.7953	0.00510089	0.0080089
176604	219356	11	692548	704327	14	11	26	29	14	17.8491	22	18.6604	23	12.6063	0.00557026	0.0080089
324481	335965	13	87955	98328	15	16	28	36	13	23.7736	19.1038	27.4717	22.0755	13.0632	0.00450196	0.00464534
324481	335965	13	126153	142002	15	16	28	36	13	23.7736	19.1038	27.4717	22.0755	13.0632	0.00450196	0.00464534
A: first segment
B: second segment
